# Supplementary material for: Digital map of the Coral Triangle: An online atlas for marine biodiversity conservation
Source: Copernicus journal article supplement (doi:10.5194/essd-2018-80), 2018-08-10
Supplement: Supplementary file 1 [file essd-2018-80-supplement.pdf]

1 **Supplementary Materials**  
2 **Asaad et al.,**  
3 **Digital map of the Coral Triangle: An online atlas for marine biodiversity conservation**  
4

5 **1. Documentation file**

6 This documentation file of the Coral Triangle Digital Map provides information on the map objectives,  
7 datasets, dataset sources, classifications, and original citations of the data sources. This file can be  
8 accessed from: <https://sites.google.com/view/coral-triangle-digital-map>.  
9

10 **1.1. Coral Triangle – General Information**  
11

12 The “*Digital Map of the Coral Triangle*” consists of three sets of web-mapping applications: [\(1\) Biodiversity Features](#), [\(2\) Areas of Importance for Biodiversity Conservation](#), [\(3\) Marine Protected Area \(MPA\) Network Expansion](#).  
14

15 The first map, Biodiversity Features, provided comprehensive data on the region's marine protected areas  
16 and biodiversity features including biogenic habitat, habitat rugosity, species richness, distribution of  
17 threatened and endemic species, and areas important for sea turtles. This tool also provided datasets of  
18 threats to the marine environment (anthropogenic and climate change induced pressure), and of  
19 environmental characteristics of the region including physical and biochemical oceanography.

20 The second map, Areas of Importance for Biodiversity Conservation, comprised of two layers: (1)  
21 regional biodiversity hotspots, and (2) Sites of biodiversity importance. Each layer was developed based  
22 on the multi-criteria analysis of five ecological criteria, namely sensitive habitat, species richness, the  
23 presence of species of conservation concern, the occurrence of restricted-range species, and areas of  
24 importance for particular life history stages of species.

25 The third map, Marine Protected Area (MPA) Network Expansion, consisted of two datasets: (1)  
26 Regional priority areas, and (2) National priority areas. The map was developed using conservation  
27 prioritization tools based on seven different sets of biodiversity features (biogenic habitat, habitat  
28 rugosity, species richness, distribution of threatened and endemic species, areas important for sea turtle),  
29 two types of threat (anthropogenic and climate change induced pressure) and the coverage of the existing  
30 MPA network.

31 The Digital Map of the Coral Triangle presents representative information to support a better  
32 understanding of important areas for biodiversity conservation and the application of marine biodiversity  
33 informatics to aid conservation prioritization.

34 **1.2. Digital Map of the Biodiversity Features in the Coral Triangle**

36 These maps provide comprehensive data on the region's marine protected areas and biodiversity features  
37 including biogenic habitat, habitat rugosity, species richness, distribution of threatened and endemic  
38 species, areas important for sea turtle. This tool also provides a dataset of threats to the marine  
39 environment (anthropogenic and climate change induced pressure), and of the environmental  
40 characteristics of the region including its physical and biochemical oceanography.  
41

42 Please acknowledge and refer to the original sources and citations of each of the datasets (provided  
43 below).  
44

45 This map, Biodiversity Features, comprises four types of data: (a) Distribution of existing Marine  
46 Protected Areas, (b) seven layers of biodiversity features, (d) two types of threat, and (e) 16  
47 environmental variables.  
48  
49

#### *The original citations of data sources*

- 50 1. Allen, G.R.: Conservation hotspots of biodiversity and endemism for Indo-Pacific coral reef  
51 fishes, *Aquat. Conserv.*, 18(5), 541-556, **2008**.
- 52 2. Allen, G.R., & Erdmann, M.V.: Reef fishes of the East Indies. Mobile Application Software,  
53 Version 1.1 (Rev.10.2016). [https://geo.itunes.apple.com/us/app/reef-fishes-east-indies-](https://geo.itunes.apple.com/us/app/reef-fishes-east-indies-vol.id705188551?mt=8)  
54 [vol.id705188551?mt=8](https://geo.itunes.apple.com/us/app/reef-fishes-east-indies-vol.id705188551?mt=8) (9)., accessed 15/06/2016, **2013**.
- 55 3. Asaad, I., Lundquist, C.J., Erdmann, M.V., & Costello, M.J.: Delineating priority areas for  
56 marine biodiversity conservation in the Coral Triangle, *Biol. Cons.*, 222, 198-211, doi:  
57 [//dx.doi.org/10.1016/j.biocon.2018.03.037](https://doi.org/10.1016/j.biocon.2018.03.037), **2018a**.
- 58 4. Asaad, I., Lundquist, C.J., Erdmann, M.V., Van Hooijdonk, R., & Costello, M.J.: Designating  
59 spatial priorities for marine biodiversity conservation in the Coral Triangle, *Front Mar.Sci.*,  
60 (Submitted), **2018b**.
- 61 5. Basher, Z., Bowden, D.A., and Costello, M.J.: Global Marine Environment Datasets (GMED)-  
62 World Wide Web electronic publication, Ver. 1.0 (Rev.01.2014), <http://gmed.auckland.ac.nz>,  
63 accessed 01/06/2016, **2014**.
- 64 6. Cros, A., Fatan, N.A., White, A., Teoh, S.J., Tan, S., Handayani, C., Huang, C., Peterson, N., Li,  
65 R.V., Siry, H.Y., Fitriana, R., Gove, J., Acoba, T., Knight, M., Acosta, R., Andrew, N., & Beare,  
66 D.: The Coral Triangle Atlas; An Integrated Online Spatial Database System for Improving Coral  
67 Reef Management, *Plos One*, 9(6), doi: 10.1371/journal.pone.0096332,  
68 <http://ctatlas.reefbase.org/>, **2014**.
- 69 7. Froese, R., & Pauly, D.: FishBase, World Wide Web electronic publication. Ver. (06/2016).  
70 [www.fishbase.org](http://www.fishbase.org), accessed 01/06/2016, **2016**.
- 71 8. Giri, C., Ochieng, E., Tieszen, L., Zhu, Z., Singh, A., Loveland, T., Masek, J., & Duke, N.: Status  
72 and distribution of mangrove forests of the world using earth observation satellite data,  
73 *Glob. Ecol. Biogeogr.*, 20(1), 154-159, **2011a**.
- 74 9. Giri, C., Ochieng, E., Tieszen, L., Zhu, Z., Singh, A., Loveland, T., Masek, J., & Duke, N.:  
75 Global distribution of mangroves forests of the world using earth observation satellite data, In  
76 Supplement to: Giri et al. (2011a), UNEP World Conservation Monitoring Centre, Cambridge –  
77 UK, <http://data.unep-wcmc.org/datasets/21>, **2011b**.
- 78 10. Halpern, B. S., Walbridge, S., Selkoe, K. A., Kappel, C. V., Micheli, F., D'Agrosa, C., Bruno, J.  
79 F., Casey, K. S., Ebert, C., Fox, H. E., Fujita, R., Heinemann, D., Lenihan, H. S., Madin, E. M.  
80 P., Perry, M. T., Selig, E. R., Spalding, M., Steneck, R., & Watson, R.: A global map of human  
81 impact on marine ecosystems, *Science*, 319(5865), 948-952, doi: 10.1126/science.1149345, **2008**.
- 82 11. Halpern, B. S., Frazier, M., Potapenko, J., Casey, K. S., Koenig, K., Longo, C., Lowndes, J. S.,  
83 Rockwood, R. C., Selig, E. R., & Selkoe, K. A.: Spatial and temporal changes in cumulative  
84 human impacts on the world's ocean, *Nat. Commun.*, 6, **2015a** Halpern, B. Frazier, M.,  
85 Potapenko, J., Casey, K.S., Koenig, K., Longo, C., Lowndes, J.S., Rockwood, R.C., Selig, E.R.,  
86 & Selkoe, K.A.: Cumulative human impacts: raw stressor data (2008 and 2013),  
87 <https://knbn.ecoinformatics.org/>, doi:10.5063/F1S180FS, accessed 01/06/2016, **2015b**.
- 88 12. IMA RS-USF., & IRD.: Millennium Coral Reef Mapping Project. Validated maps, UNEP World  
89 Conservation Monitoring Centre, Cambridge – UK, **2005**.
- 90 13. IUCN, & UNEP-WCMC.: The World Database on Protected Areas (WDPA). UNEP - World  
91 Conservation Monitoring Centre, [www.protectedplanet.net](http://www.protectedplanet.net), Cambridge – UK, assessed  
92 01/08/2016, **2016**.

- 93 14. Kaschner, K., Rius-Barile, J., Kesner-Reyes, K., Garilao, C., Kullander, S.O., Rees, T., &  
94 Froese, R.: AquaMaps; Predicted range maps for aquatic species, World Wide Web electronic  
95 publication, [www.aquamaps.org](http://www.aquamaps.org)., Version 08/2016, accessed 01/08/2016, **2016**.  
96 15. MoF-MoMAF.: Data of the Ecological representation gap analysis for conservation areas in  
97 Indonesia, Ministry of Forestry and Ministry of Marine Affairs and Fisheries, Jakarta-Indonesia,  
98 **2010**.  
99 16. MoMAF.: The database of Marine Protected Areas in Indonesia, Ministry of Marine Affairs and  
100 Fisheries, Jakarta – Indonesia, **2016**.  
101 17. OBIS.: Data from the Ocean Biogeographic Information System, Intergovernmental  
102 Oceanographic Commission of UNESCO, <http://www.iobis.org/>., accessed 22/01/2015, **2015**.  
103 18. UNEP-WCMC, Short FT.: Global distribution of seagrasses (version 2).  
104 [http://data.unepwcmc.org/datasets/10\(polygons\)](http://data.unepwcmc.org/datasets/10(polygons)) and [data.unep-wcmc.org/datasets/9](http://data.unep-wcmc.org/datasets/9) (points),  
105 UNEP World Conservation Monitoring Centre. Cambridge – UK, 2005.  
106 19. UNEP-WCMC, WorldFish Centre, WRI, & TNC.: Global Distribution of Warmwater Coral  
107 Reefs, <http://data.unep-wcmc.org/datasets/13>, UNEP-World Conservation Monitoring Centre,  
108 Cambridge-UK, **2010**.  
109 20. Van Hooidonk, R., Maynard, J., Tamelander, J., Gove, J., Ahmadia, G., Raymundo, L., Williams,  
110 G., Heron, S. F., & Planes, S.: Local-scale projections of coral reef futures and implications of the  
111 Paris Agreement. *Sci. Rep.*, 6, 39666, **2016**.  
112 21. VLIZ.: Maritime Boundaries Geodatabase, <http://www.marineregions.org>. Version 8, accessed  
113 22/03/2016, **2014**.  
114 22. Wright, D., Pendleton, M., Boulware, J., Walbridge, S., Gerlt, B., Eslinger, D., Sampson, D., &  
115 Huntley, E.: ArcGIS Benthic Terrain Modeler (BTM), V. 3.0, Environmental Systems Research  
116 Institute (ESRI), NOAA Coastal Services Centre, Massachusetts Office of Coastal Zone  
117 Management, Redlands – CA, **2012**.  
118

119 Table S1. Coral Triangle datasets specifications.

| Data layer                               | Feature                                                              | Type,<br>Spatial<br>Resolution,<br>Class | Descriptions                                                                                                                                                                                                                                | References                                          |
|------------------------------------------|----------------------------------------------------------------------|------------------------------------------|---------------------------------------------------------------------------------------------------------------------------------------------------------------------------------------------------------------------------------------------|-----------------------------------------------------|
| 1                                        | 2                                                                    | 3                                        | 4                                                                                                                                                                                                                                           | 5                                                   |
| <b>Base Layers</b>                       |                                                                      |                                          |                                                                                                                                                                                                                                             |                                                     |
| a. Coral Triangle boundary               | Generated from the Coral Triangle Initiative Implementation boundary | Polygon                                  | The boundary covers the full exclusive economic zones (EEZs) of Indonesia, Malaysia, Papua New Guinea, the Philippines, Solomon Islands, and Timor-Leste, and includes the EEZs of two additional nations: Brunei Darussalam and Singapore. | VLIZ, (2014)                                        |
| b. Country boundary                      | Internal boundary of Coral Triangle countries                        | Polyline                                 | The EEZ and internal boundaries are indicative only, and a dispute over boundaries exists.                                                                                                                                                  | VLIZ, (2014)                                        |
| c. Marine protected areas (MPA) coverage | Coverage of 678 units of MPA                                         | Polygon                                  | The layers' attribute table provides detailed information following its native sources (WDPA, CTAtlas) (e.g., information of Name, Local Name, Designation Type, IUCN Category, coverage                                                    | IUCN & UNEP-WCMC (2016); Cros <i>et al.</i> (2014); |

Table S1. continued

| 1                                  | 2                                                                                                                            | 3                                    | 4                                                                                                                                                                                                                                                              | 5                                                                                                                             |
|------------------------------------|------------------------------------------------------------------------------------------------------------------------------|--------------------------------------|----------------------------------------------------------------------------------------------------------------------------------------------------------------------------------------------------------------------------------------------------------------|-------------------------------------------------------------------------------------------------------------------------------|
|                                    |                                                                                                                              |                                      | etc.) (IUCN & UNEP-WCMC,2016; Cros <i>et al.</i> ,2014) with amendment and adjustment from local sources (Indonesian database).<br>To allow simple indexing, a new CT MPAs ID format (MPA_ID) is introduced. The new ID consists of 10 digits: "A BC DEFG HIJ" | MoF-MoMAF (2010); MoMAF (2016).                                                                                               |
| <b>Biodiversity Features</b>       |                                                                                                                              |                                      |                                                                                                                                                                                                                                                                |                                                                                                                               |
| a. Biogenic Habitat                | Spatial distribution of coral reef, seagrass and mangroves.                                                                  | Grid square cells; 5 km; 3 classes   | Calculated based on the number of biogenic habitat present in each cell. Cell values ranged from 1 – 3.                                                                                                                                                        | IMaRS-USF. & IRD., (2005); UNEP-WCMC <i>et al.</i> , (2010); Giri <i>et al.</i> , (2011a), (2011b); UNEP-WCMC & Short, (2005) |
| b. Species richness - Ranges       | A modeled geographic distribution of 10,672 species ranges.                                                                  | Grid square cells; 50 km; 10 classes | Calculated based on the number of predicted species in each cell. The number of predicted species per cell ranged from 0 to 5,509.                                                                                                                             | Kaschner <i>et al.</i> (2016)                                                                                                 |
| c. Species richness - Occurrence   | The occurrence records of 19,251 species.                                                                                    | Grid square cells; 50 km; 10 classes | Based on the index of expected species richness of ES <sub>50</sub> (estimated species in random 50 samples).                                                                                                                                                  | OBIS, (2015)                                                                                                                  |
| d. Species of conservation concern | The occurrence records of 834 species of conservation concern (Bony fish, anthozoans, elasmobranchs, mammals, and molluscs). | Grid square cells; 50 km; 10 classes | Based on the index of expected species richness of ES <sub>35</sub> (estimated species in random 50 samples).                                                                                                                                                  | OBIS, (2015); Froese & Pauly, (2016); IUCN (2015); UNEP-WCMC (2015)                                                           |
| e. Species of restricted-range     | The distribution of 373 restricted-range reef fish species.                                                                  | Grid square cells; 5 km; 10 classes  | Calculated based on the number of species present in each cell. Cell values ranged from 1 – 101.                                                                                                                                                               | Allen, (2008); Allen & Erdmann, (2012)                                                                                        |
| f. Important areas for sea turtle  | Nesting sites and migratory route of 6 species (2,055 records).                                                              | Grid square cells; 5 km; 3 classes   | The richness calculated based on the number of sea turtle species present in each cell ( <i>i.e.</i> , 1, 2, 3).                                                                                                                                               | MoF-MoMAF, (2010); OBIS, (2015)                                                                                               |

Table S1. continued

| 1                                                        | 2                                                                                                                       | 3                                                                                                  | 4                                                                                                                                                                                                                                                                                                                                                                                                                                                                         | 5                                                              |
|----------------------------------------------------------|-------------------------------------------------------------------------------------------------------------------------|----------------------------------------------------------------------------------------------------|---------------------------------------------------------------------------------------------------------------------------------------------------------------------------------------------------------------------------------------------------------------------------------------------------------------------------------------------------------------------------------------------------------------------------------------------------------------------------|----------------------------------------------------------------|
| g. Habitat rugosity                                      | A Vector Ruggedness Measure (VRM) of benthic terrain, generated from bathymetric data.                                  | Grid square cells; 50 km; 10 classes                                                               | The VRM index ranged from 0.1 (areas with low terrain variations to 0.9 (areas with high terrain variations).                                                                                                                                                                                                                                                                                                                                                             | Basher <i>et al.</i> , (2014); Wright <i>et al.</i> , (2012)   |
| h. Anthropogenic Pressure (AP)                           | Spatial distribution of AP on marine environments.                                                                      | Grid square cells; 5 km; 10 classes                                                                | The cumulative impact of 19 different types of anthropogenic stressors. The AP value ranged from 0 – 15.4, indicating areas from low to high human-induced pressure.                                                                                                                                                                                                                                                                                                      | Halpern <i>et al.</i> , (2008); Halpern <i>et al.</i> , (2015) |
| i. Climate Change Pressure                               | Spatial distribution of sea surface thermal stress level (the average of Degree Heating Weeks (DHW) from 2006 to 2099). | Grid square cells; 5 km; 10 classes                                                                | The projected thermal stress index ranged from 5.6 – 20.2, indicating areas from low to high vulnerability to climate change.                                                                                                                                                                                                                                                                                                                                             | Van Hooidonk <i>et al.</i> , (2016)                            |
| j. Environmental Variables                               | Spatial distribution of environmental variables (physical, biochemical and nutrients).                                  | Point; 50 km; 10 classes                                                                           | Composite point features of 16 environmental variables, i.e., depth, slope, land distance, temperature, surface current, salinity, wind speed, tide, primary productivity, photosynthetically active radiation (PAR), chlorophyll-a, pH, dissolved oxygen, nitrate, silicate, and calcite.                                                                                                                                                                                | Basher <i>et al.</i> , (2014).                                 |
| <b>Areas of Importance for Biodiversity Conservation</b> |                                                                                                                         |                                                                                                    |                                                                                                                                                                                                                                                                                                                                                                                                                                                                           |                                                                |
| a. Regional biodiversity hotspots                        | Clusters of areas of biodiversity importance.                                                                           | Grid square cells; 55 km; 3 classes of hotspots (high, medium and low) and 1 class not significant | Developed based on the multi-criteria analysis to five ecological criteria (sensitive habitat, species richness, the presence of species of conservation concern, the occurrence of restricted-range species, areas of importance for particular life history stages).<br><br>Analyzed based on the spatial patterns of data using the hotspots analysis tool in ArcGIS. The analysis clustered the cells from hotspot (high score cells) to coldspots (low score cells). | Asaad <i>et al.</i> , (2018a).                                 |

| <i>Table S1. continued</i>                           |                                                                                                         |                                                                                     |                                                                                                                                                                                                                                                                                                                                                                                                                                                                                                                                                                                                                                                                                                              |                                |
|------------------------------------------------------|---------------------------------------------------------------------------------------------------------|-------------------------------------------------------------------------------------|--------------------------------------------------------------------------------------------------------------------------------------------------------------------------------------------------------------------------------------------------------------------------------------------------------------------------------------------------------------------------------------------------------------------------------------------------------------------------------------------------------------------------------------------------------------------------------------------------------------------------------------------------------------------------------------------------------------|--------------------------------|
| <i>1</i>                                             | <i>2</i>                                                                                                | <i>3</i>                                                                            | <i>4</i>                                                                                                                                                                                                                                                                                                                                                                                                                                                                                                                                                                                                                                                                                                     | <i>5</i>                       |
| b. Sites of biodiversity importance                  | Distribution of sites of areas of biodiversity importance.                                              | Grid square cells; 55 km; 5 classes (high, medium-high, medium, medium-low and low) | <p>Developed based on the similar ecological criteria to those used in the biodiversity hotspots region analysis.</p> <p>While the hotspots analysis identified clustered areas of biodiversity importance, The site-based analysis identifies specific sites of highest biodiversity importance by analyzing the biodiversity score of each cell. The higher the score, the higher their biodiversity importance.</p>                                                                                                                                                                                                                                                                                       | Asaad <i>et al.</i> , (2018a). |
| a. Sites of biodiversity importance                  | Distribution of sites of areas of biodiversity importance.                                              | Grid square cells; 55 km; 5 classes (high, medium-high, medium, medium-low and low) | <p>Developed based on the similar ecological criteria to those used in the biodiversity hotspots region analysis.</p> <p>While the hotspots analysis identified clustered areas of biodiversity importance, The site-based analysis identifies specific sites of highest biodiversity importance by analyzing the biodiversity score of each cell. The higher the score, the higher their biodiversity importance.</p>                                                                                                                                                                                                                                                                                       | Asaad <i>et al.</i> , (2018a). |
| <b>Marine Protected Area (MPA) Network Expansion</b> |                                                                                                         |                                                                                     |                                                                                                                                                                                                                                                                                                                                                                                                                                                                                                                                                                                                                                                                                                              |                                |
| a. Regional priority areas                           | Spatial distribution of regional priority areas with three expansion scenario layers: 10%, 20% and 30%. | Grid square cells; 0.5 km                                                           | <p>Prioritization analyses were performed using <i>Zonation</i> tools to analyze the proportions of the CT region placed into an MPA network (<i>e.g.</i>, expansion of the MPA network from existing coverage to 10%, 20% and 30 % of the Economic Exclusive Zone (EEZ) area).</p> <p>The prioritization scenarios were based on seven sets of biodiversity features (biogenic habitat, habitat rugosity, species richness, distribution of threatened and endemic species, areas important for sea turtle); two types of threat (anthropogenic and climate change induced pressure); and the coverage of the existing MPA network.</p> <p>Regional analyses were performed for the full CT EEZ region.</p> | Asaad <i>et al.</i> , (2018a). |

| <i>Table S1. continued</i> |                                                                                                                                                                                                                       |                           |                                                                                                                                                                                                                                                |                                |
|----------------------------|-----------------------------------------------------------------------------------------------------------------------------------------------------------------------------------------------------------------------|---------------------------|------------------------------------------------------------------------------------------------------------------------------------------------------------------------------------------------------------------------------------------------|--------------------------------|
| <i>1</i>                   | <i>2</i>                                                                                                                                                                                                              | <i>3</i>                  | <i>4</i>                                                                                                                                                                                                                                       | <i>5</i>                       |
| b. National Priority Areas | Spatial distribution of national priority areas with six layers of scenarios representing national MPA network expansion for Indonesia, Malaysia, the Philippines, Papua New Guinea, Solomon Islands and Timor Leste. | Grid square cells; 0.5 km | <p>Developed based on the same approach as the regional priority areas.</p> <p>National analyses were performed individually on each CT country national EEZ.</p> <p>Each layer consisted of 3 scenarios of MPA expansion (10%, 20%, 30% )</p> | Asaad <i>et al.</i> , (2018b). |

120

### 121 1.3. Digital Map of the Areas of Biodiversity Importance in the Coral Triangle

122

123 The digital map of areas of biodiversity importance in the Coral Triangle is comprised of: (1) Regional  
124 biodiversity hotspots, (2) Sites of biodiversity importance.

125 This dataset is comprised of two layers of areas of biodiversity importance. Each layer was developed  
126 based on a multi-criteria analysis of five ecological criteria: (1) fragile and sensitive habitat (the coverage  
127 of biogenic habitats: coral reefs, seagrass and mangrove); (2) species richness (modeled geographic  
128 distributions of 10,672 species ranges and occurrence records of 19,251 species); (3) the presence of  
129 species of conservation concern (distributions of 834 species of special conservation concern); (4) the  
130 occurrence of restricted-range species (distributions of 373 restricted-range reef fish species); and (6)  
131 areas of importance for particular life history stages (distribution of six species of sea turtle).

132 The datasets were clipped to the CT region using a grid approach of half-degree cells (0.5°), where each  
133 cell covered an area of ~ 55 x 55 km. All of the datasets obtained from each criterion were superimposed  
134 to produce an integrated dataset. The areas of biodiversity importance were analyzed based on the  
135 biodiversity score of each cell. The score of each criterion was calculated based on the total number of  
136 habitat, species or species index that fell within each cell.

137 The map comprises:

138 a) The regional biodiversity hotspots analyzed using ESRI's hotspots analysis tools ESRI ArcGIS  
139 (ESRI, 2016b; Getis & Ord, 1992; Ord & Getis, 1995). The statistically significant Z scores (GI\*  
140 statistics) were analyzed by comparing the local sum of a cell's score and its neighbors  
141 proportionally to the sum of all cells' scores. The hotspots analysis clustered the area into three  
142 classes of hotspots (99%, 95% and, 90% confidence level), and one class of non-statistically  
143 significant clusters.

144 b) The sites of biodiversity importance that identified areas of biodiversity importance by analyzing  
145 the biodiversity score of each cell. The higher the score, the higher their biodiversity importance.  
146 The cells were ranked into five equal interval classes, from high to low biodiversity importance.

147

148

149 **1.4. Digital Map of the Priority Areas for MPA Network Expansion**

150

151 The digital map of priority areas for marine protected area (MPA) network expansion in the Coral  
152 Triangle region is comprised of: (1) Regional priority areas, (2) National priority areas.

153 Spatial distributions of priority areas for marine protected area network expansion are illustrated for the  
154 Coral Triangle. These datasets were developed using the conservation prioritization tool of *Zonation*, by  
155 analyzing the proportions of the CT region's area that is within the existing CT MPA network and then  
156 prioritizing areas for MPA network expansion (*e.g.*, expansion of the MPA network from existing  
157 coverage to 10%, 20% and 30 % of the Economic Exclusive Zone (EEZ) area).

158 These datasets comprise two sets of maps: (1) Regional priority areas (performed for the full CT EEZ  
159 region) and (2) National priority areas (performed individually on each of the CT country national EEZs).

160 All analyses were performed using sets of raster grids, with a spatial resolution of 500 m. The  
161 prioritization analyses were based on seven different sets of biodiversity features: biogenic habitat, habitat  
162 rugosity, species richness, distribution of threatened and endemic species, areas important for sea turtles,  
163 two types of threat (anthropogenic and climate change induced pressure), and the coverage of the existing  
164 MPA network.
